# Supplementary material for: Feeding ecology of scolopendromorphs: integrating a global literature review with Japanese citizen-sourced data
Source: PeerJ. 2026 Jan 5;14:e20482. doi: 10.7717/peerj.20482 (PMC12782032; doi:10.7717/peerj.20482)
Supplement: Supplemental Information 2 [file peerj-14-20482-s002.xlsx]

## Sheet: Indirect observation
Supplement 2. Feeding records of scolopendromorphs under natural conditions based on indirect observation.
Prey class group	Prey order Group	Prey family group	Prey species name	Predator family	Predator species name	Methods	Study site	Area	Ref.	Notes
Reptilia	Squamata	Gekkonidae	Hemidactylus frenatus	Scolopendridae	Scolopendra subspinipes	DNA barcoding	Christmas Island, Western Australia	Australia and New Zealand	Emery, Valentine, et al., 2021
Reptilia	Squamata	Gekkonidae	Hemidactylus frenatus	Scolopendridae	Scolopendra subspinipes	DNA barcoding	Christmas Island, Western Australia	Australia and New Zealand	Steve Donnellan and Kyle Armstrong, unpubl. Data (quoted by Smith et al., 2012)
Reptilia	Squamata	Gekkonidae	Gehyra mutilata	Scolopendridae	Scolopendra subspinipes	DNA barcoding	Christmas Island, Western Australia	Australia and New Zealand	Steve Donnellan and Kyle Armstrong, unpubl. Data (quoted by Smith et al., 2012)
Reptilia	Squamata	Scincidae	Gongylomorphus bojerii	Scolopendridae	Scolopendra abnormis	DNA barcoding	Round Island, Mauritius	Eastern Africa	Tercel et al., 2024
Reptilia	Squamata	Gekkonidae	Christinus guentheri	Scolopendridae	Cormocephalus coynei	stable isotope analysis	Phillip Island, Norfolk Island group	Australia and New Zealand	Halpin et al., 2021
Reptilia	Squamata	Scincidae	Oligosoma lichenigerum	Scolopendridae	Cormocephalus coynei	stable isotope analysis	Phillip Island, Norfolk Island group	Australia and New Zealand	Halpin et al., 2021
Osteichthyes	-	-	marine fishes	Scolopendridae	Cormocephalus coynei	stable isotope analysis	Phillip Island, Norfolk Island group	Australia and New Zealand	Halpin et al., 2021	At the species level, Engraulis australis is included.
Mammalia	Primate	Hominidae	Homo sapiens	Scolopendridae	Scolopendra subspinipes	DNA barcoding	Christmas Island, Western Australia	Australia and New Zealand	Emery, Valentine, et al., 2021	Contamination?
Malacostraca	Decapoda	-	-	Scolopendridae	Scolopendra abnormis	DNA barcoding	Round Island, Mauritius	Eastern Africa	Tercel et al., 2024	including 1 species
Malacostraca	Isopoda	-	-	Scolopendridae	Scolopendra abnormis	DNA barcoding	Round Island, Mauritius	Eastern Africa	Tercel et al., 2024	including 1 species
Insecta	Blattodea	Blaberidae	Pycnoscelus sp.	Scolopendridae	Scolopendra subspinipes	DNA barcoding	Christmas Island, Western Australia	Australia and New Zealand	Emery, Valentine, et al., 2021
Insecta	Blattodea	Blaberidae	Periplaneta americana	Scolopendridae	Scolopendra subspinipes	DNA barcoding	Christmas Island, Western Australia	Australia and New Zealand	Emery, Valentine, et al., 2021
Insecta	Blattodea	-	-	Scolopendridae	Scolopendra abnormis	DNA barcoding	Round Island, Mauritius	Eastern Africa	Tercel et al., 2024	including 1 species
Insecta	Coleoptera	-	-	Scolopendridae	Scolopendra abnormis	DNA barcoding	Round Island, Mauritius	Eastern Africa	Tercel et al., 2024	including 5 species
Insecta	Diptera	-	-	Scolopendridae	Scolopendra abnormis	DNA barcoding	Round Island, Mauritius	Eastern Africa	Tercel et al., 2024	including 5 species
Insecta	Hemiptera	-	-	Scolopendridae	Scolopendra abnormis	DNA barcoding	Round Island, Mauritius	Eastern Africa	Tercel et al., 2024	including 3 species
Insecta	Hymenoptera	-	-	Scolopendridae	Scolopendra abnormis	DNA barcoding	Round Island, Mauritius	Eastern Africa	Tercel et al., 2024	including 18 species
Insecta	Lepidoptera	-	-	Scolopendridae	Scolopendra abnormis	DNA barcoding	Round Island, Mauritius	Eastern Africa	Tercel et al., 2024	including 14 species
Insecta	Phasmatodea	-	-	Scolopendridae	Scolopendra abnormis	DNA barcoding	Round Island, Mauritius	Eastern Africa	Tercel et al., 2024	including 2 species
Insecta	Orthoptera	-	-	Scolopendridae	Scolopendra abnormis	DNA barcoding	Round Island, Mauritius	Eastern Africa	Tercel et al., 2024	including 1 species
Insecta	Coleoptera	-	-	Scolopendridae	Scolopendra morsitans amazonica	gut content analysis	Khartoum, Republic of the Sudan	Northeast Africa	Lewis 1966
Insecta	Coleoptera	Staphylinidae	-	Scolopendridae	Scolopendra morsitans amazonica	gut content analysis	Khartoum, Republic of the Sudan	Northeast Africa	Lewis 1966
Insecta	-	-	-	Scolopendridae	Scolopendra morsitans amazonica	gut content analysis	Khartoum, Republic of the Sudan	Northeast Africa	Lewis 1966
Insecta	Diptera	-	-	Scolopendridae	Scolopendra morsitans amazonica	gut content analysis	Khartoum, Republic of the Sudan	Northeast Africa	Lewis 1966
Insecta	Coleoptera	Carabidae	-	Scolopendridae	Scolopendra morsitans amazonica	gut content analysis	Khartoum, Republic of the Sudan	Northeast Africa	Lewis 1966
Insecta	Hymenoptera	Formicidae	Camponotus sp.	Scolopendridae	Scolopendra morsitans amazonica	gut content analysis	Khartoum, Republic of the Sudan	Northeast Africa	Lewis 1966
Insecta	-	-	-	Cryptopidae	Cryptops agilis	gut content analysis	Belgium	Western Europe	Plateau 1878
Insecta	Hymenoptera	Formicidae	-	Scolopendridae	Cormocephalus coynei	stable isotope analysis	Phillip Island, Norfolk Island group	Australia and New Zealand	Halpin et al., 2021
Insecta	Orthoptera	Gryllidae	-	Scolopendridae	Cormocephalus coynei	stable isotope analysis	Phillip Island, Norfolk Island group	Australia and New Zealand	Halpin et al., 2021	The species names are Dictyonemobius pacificus, Dictyonemobius lateralis, or Nesitathra phillipensis.
Insecta	Coleoptera	-	-	Scolopendridae	Cormocephalus coynei	stable isotope analysis	Phillip Island, Norfolk Island group	Australia and New Zealand	Halpin et al., 2021
Insecta	Lepidoptera	-	-	Scolopendridae	Cormocephalus coynei	stable isotope analysis	Phillip Island, Norfolk Island group	Australia and New Zealand	Halpin et al., 2021
Gastropoda	-	-	-	Scolopendridae	Scolopendra abnormis	DNA barcoding	Round Island, Mauritius	Eastern Africa	Tercel et al., 2024	including 4 species
Gammaproteobacteria	Enterobacterales	Pectobacteriaceae	Citrobacter werkmanii	Scolopendridae	Scolopendra subspinipes	DNA barcoding	Christmas Island, Western Australia	Australia and New Zealand	Emery, Valentine, et al., 2021	Contamination?
Diplopoda	Polydesmida	Paradoxosomatidae	Oxidus gracilis	Scolopendridae	Cormocephalus coynei	stable isotope analysis	Phillip Island, Norfolk Island group	Australia and New Zealand	Halpin et al., 2021
Clitellata	Opisthopora	Lumbricidae	Allolobophora chlorotica	Cryptopidae	Cryptops anomalans	gut content analysis	Belgium	Western Europe	Plateau 1878	Original discription is Lumbricus communis and Cryptops savignyi.
Chilopoda	Scolopendromorpha	Scolopendridae	Scolopendra subspinipes	Scolopendridae	Scolopendra subspinipes	DNA barcoding	Christmas Island, Western Australia	Australia and New Zealand	Emery, Valentine, et al., 2021	Cannibalism
Chilopoda	-	-	-	Scolopendridae	Scolopendra morsitans amazonica	gut content analysis	Khartoum, Republic of the Sudan	Northeast Africa	Lewis 1966
Chilopoda	Scolopendromorpha	Cryptopidae	Cryptops sp.	Scolopendridae	Scolopendra morsitans amazonica	gut content analysis	Khartoum, Republic of the Sudan	Northeast Africa	Lewis 1966
Chilopoda	Scutigeromorpha	-	-	Scolopendridae	Scolopendra morsitans amazonica	gut content analysis	Khartoum, Republic of the Sudan	Northeast Africa	Lewis 1966
Chilopoda	Geophilomorpha	-	-	Scolopendridae	Scolopendra morsitans amazonica	gut content analysis	Khartoum, Republic of the Sudan	Northeast Africa	Lewis 1966
Chilopoda	Geophilomorpha	Mecistocephalidae	Mecistocephalus sp.	Scolopendridae	Scolopendra morsitans amazonica	gut content analysis	Khartoum, Republic of the Sudan	Northeast Africa	Lewis 1966
Chilopoda	Scolopendromorpha	Scolopendridae	-	Scolopendridae	Scolopendra morsitans amazonica	gut content analysis	Khartoum, Republic of the Sudan	Northeast Africa	Lewis 1966
Chilopoda	Geophilomorpha	Geophilidae	Geophilus sp.	Cryptopidae	Cryptops anomalans	gut content analysis	Belgium	Western Europe	Plateau 1878	Original discription is Cryptops savignyi.
Chilopoda	Geophilomorpha	Himantariidae	Himantarium sp.	Cryptopidae	Cryptops anomalans	gut content analysis	Belgium	Western Europe	Plateau 1878	Original discription is Cryptops savignyi.
Chilopoda	Geophilomorpha	-	-	Cryptopidae	Cryptops anomalans	gut content analysis	Belgium	Western Europe	Plateau 1878	Original discription is Cryptops savignyi.
Chilopoda	Scolopendromorpha	Scolopendridae	Cormocephalus coynei	Scolopendridae	Cormocephalus coynei	stable isotope analysis	Phillip Island, Norfolk Island group	Australia and New Zealand	Halpin et al., 2021	Cannibalism
Chilopoda	Scolopendromorpha	Cryptopidae	Cryptops anomalans	Cryptopidae	Cryptops anomalans	gut content analysis	France	Western Europe	Balbiani 1890	Cannibalism. Original discription is Cryptops punctatus.
Aves	Procellariiformes	Procellariidae	Pterodroma nigripennis	Scolopendridae	Cormocephalus coynei	stable isotope analysis	Phillip Island, Norfolk Island group	Australia and New Zealand	Halpin et al., 2021
Aves	Charadriiformes	Laridae	Anous minutus	Scolopendridae	Cormocephalus coynei	stable isotope analysis	Phillip Island, Norfolk Island group	Australia and New Zealand	Halpin et al., 2021	According to the author, this is considered scavenging.
Arachnida	Acari	-	-	Scolopendridae	Scolopendra abnormis	DNA barcoding	Round Island, Mauritius	Eastern Africa	Tercel et al., 2024	including 4 species
Arachnida	Araneae	-	-	Scolopendridae	Scolopendra abnormis	DNA barcoding	Round Island, Mauritius	Eastern Africa	Tercel et al., 2024	including 1 species
Arachnida	Araneae	-	-	Scolopendridae	Scolopendra morsitans amazonica	gut content analysis	Khartoum, Republic of the Sudan	Northeast Africa	Lewis 1966
Arachnida	Acari	-	-	Cryptopidae	Cryptops anomalans	gut content analysis	Belgium	Western Europe	Plateau 1878	Original discription is Cryptops savignyi.
Arachnida	Araneae	-	-	Cryptopidae	Cryptops anomalans	gut content analysis	Belgium	Western Europe	Plateau 1878	Original discription is Cryptops savignyi.
Arachnida	Araneae	-	-	Cryptopidae	Cryptops hortensis	gut content analysis	Belgium	Western Europe	Plateau 1878
Arachnida	Araneae	-	-	Scolopendridae	Cormocephalus coynei	stable isotope analysis	Phillip Island, Norfolk Island group	Australia and New Zealand	Halpin et al., 2021
Arachnida	Acari	Astigmata	-	Cryptopidae	Cryptops anomalans	gut content analysis	France	Western Europe	Balbiani 1890	Original discription is Cryptops punctatus.
-	-	-	Vegetable residues	Cryptopidae	Cryptops sp.	gut content analysis	-	-	Voigtländer 2011
